1                   Efficient Prediction of Vitamin B Deficiencies via  
2           Machine-learning Using Routine Blood Test Results in Patients  
3                   With Intense Psychiatric Episode

4  
5   Hidetaka Tamune<sup>1)2)3)5)\*</sup>, Jumpei Ukita<sup>3)4)5)</sup>, Yu Hamamoto<sup>1)2)</sup>, Hiroko Tanaka<sup>1)2)</sup>, Kenji  
6   Narushima<sup>1)</sup>, Naoki Yamamoto<sup>1)</sup>

7   1) Department of Neuropsychiatry, Tokyo Metropolitan Tama Medical Center, Tokyo,  
8   Japan

9   2) Department of Neuropsychiatry, Graduate School of Medicine, The University of  
10   Tokyo, Tokyo, Japan

11   3) Mental Health Research Course, Faculty of Medicine, The University of Tokyo,  
12   Tokyo, Japan

13   4) Department of Physiology, Graduate School of Medicine, The University of Tokyo,  
14   Tokyo, Japan

15   5) H. Tamune and JU contributed equally to this work

16

17   \* Correspondence:

18   Hidetaka Tamune, M.D., tamune-tyk@umin.ac.jp

19

20   Abstract: 294 words

21   Main text: 1878 words + 4 Tables + 4 Figures + 24 references

22   Keywords: Machine Learning; Random Forest Classifier; Vitamin B Deficiency; Folic  
23   Acid; Early Diagnosis; Decision support techniques or decision making.

24

25 **Abstract**

26 **Background:** Vitamin B deficiency is common worldwide and may lead to psychiatric  
27 symptoms; however, vitamin B deficiency epidemiology in patients with intense  
28 psychiatric episode has rarely been examined. Moreover, vitamin deficiency testing is  
29 costly and time-consuming. It hampered to effectively rule out vitamin  
30 deficiency-induced intense psychiatric symptoms. In this study, we aimed to clarify the  
31 epidemiology of these deficiencies and efficiently predict them using machine-learning  
32 models from patient characteristics and routine blood test results that can be obtained  
33 within one hour.

34 **Methods:** We reviewed 497 consecutive patients deemed to be at imminent risk of  
35 seriously harming themselves or others over 2 years. Machine-learning models were  
36 trained to predict each deficiency from age, sex, and 29 routine blood test results.

37 **Results:** We found that 112 (22.5%), 80 (16.1%), and 72 (14.5%) patients had vitamin  
38 B<sub>1</sub>, vitamin B<sub>12</sub>, and folate (vitamin B<sub>9</sub>) deficiency, respectively. Also, the  
39 machine-learning models well generalized to predict the deficiency in the future unseen  
40 data; areas under the receiver operating characteristic curves for the validation dataset  
41 (i.e. dataset not used for training the models) were 0.716, 0.599, and 0.796, respectively.  
42 The Gini importance of these vitamins provided further evidence of a relationship  
43 between these vitamins and the complete blood count, while also indicating a hitherto  
44 rarely considered, potential association between these vitamins and alkaline phosphatase  
45 (ALP) or thyroid stimulating hormone (TSH).

46 **Discussion:** This study demonstrates that machine-learning can efficiently predict some  
47 vitamin deficiencies in patients with active psychiatric symptoms, based on the largest  
48 cohort to date with intense psychiatric episode. The prediction method may expedite  
49 risk stratification and clinical decision-making regarding whether replacement therapy  
50 should be prescribed. Further research includes validating its external generalizability in  
51 other clinical situations and clarify whether interventions based on this method can

52 improve patient care and cost-effectiveness.

53

54 **1. Introduction**

55 Vitamin B deficiency is common worldwide and may lead to psychiatric  
56 symptoms<sup>1-4</sup>. For example, meta-analyses have shown that patients with schizophrenia  
57 or first-episode psychosis have lower folate (vitamin B<sub>9</sub>) levels than their healthy  
58 counterparts<sup>4,5</sup>. Moreover, vitamin therapy can effectively alleviate symptoms in a  
59 subgroup of patients with schizophrenia<sup>3,6-8</sup>. However, the epidemiology of vitamin B  
60 deficiency in patients with active mental symptoms requiring immediate hospitalization  
61 has rarely been examined.

62 In a psychiatric emergency, psychiatrists should promptly distinguish treatable  
63 patients with altered mental status due to a physical disease from patients with an  
64 authentic mental disorder (international statistical classification of diseases and related  
65 health problems-10, ICD-10 code: F2-9). However, vitamin deficiency testing is very  
66 costly (around 60 dollars for each measurement of vitamin B<sub>1</sub> (vitB<sub>1</sub>), vitamin B<sub>12</sub>  
67 (vitB<sub>12</sub>), or folate in the U.S.; 15–25 dollars for each test in Japan) and usually requires  
68 at least two days. Therefore, an efficient, cost-effective method of predicting vitamin B  
69 deficiency is needed.

70 Although several studies have applied machine-learning to the prediction of  
71 diagnosis or treatment outcomes<sup>9-11</sup>, no study using machine-learning has focused on  
72 vitamin B deficiencies. We herein explore whether vitB<sub>1</sub>, vitB<sub>12</sub>, and folate deficiencies  
73 can be predicted using a machine-learning classifier from patient characteristics and  
74 routine blood test results obtained within one hour based on a large cohort of patients  
75 requiring urgent psychiatric hospitalization.

76

## 77 **2. Methods**

### 78 **2.1. Medical chart review**

79 We reviewed consecutive patients admitted to the Department of  
80 Neuropsychiatry at Tokyo Metropolitan Tama Medical Center between September 2015  
81 and August 2017 under the urgent involuntary hospitalization law, which requires the  
82 immediate psychiatric hospitalization of patients at imminent risk of seriously harming  
83 themselves or others. The necessity of hospitalization was judged by designated mental  
84 health specialists. The patient characteristics, ICD-10 codes, and laboratory data were  
85 gathered retrospectively.

86 Since the reference ranges for vitB<sub>1</sub>, vitB<sub>12</sub>, and folate are 70–180 nmol/L  
87 (30–77 ng/mL), 180–914 ng/L, and > 4.0 µg/L, respectively<sup>12</sup>, a deficiency of the  
88 nutrients was defined as < 30 ng/mL, < 180 ng/L, and < 4.0 µg/L, respectively, unless  
89 otherwise stated.

90

### 91 **2.2. Random forest classifier and statistics**

92 A random forest classifier was trained to predict the deficiency of each  
93 substance from age, sex, and 29 routine blood variables (described in the Result section  
94 with values). The random forest classifier was trained using the dataset populated in the  
95 period from September 2015 to December 2016 (the “Training set”). First, we  
96 optimized the hyperparameters of the classifier by selecting the best combination of  
97 hyperparameters that maximized the “5-fold cross validation” accuracy, among many  
98 combinations within appropriate ranges. The cross-validation accuracy was computed as  
99 follows; in one session, the classifier was trained using 80% of the training set and  
100 evaluated on the withheld 20% of the training set. This session was performed five  
101 times so that every data would be withheld once. The accuracies were finally averaged  
102 across sessions to yield the cross-validation accuracy. By incorporating this process, the  
103 classifier was generalized to unseen data (Graphical method is shown in **Figure 1**).

104           Using the optimized hyperparameters, the classifiers were then validated using  
105 data collected from January 2017 through August 2017 (the “Validation set”). We report  
106 the classification performance on the validation set in the results section unless  
107 otherwise stated. We quantified the sensitivity, specificity, and accuracy (defined as the  
108 average of the sensitivity and the specificity on the optimal operating point) using  
109 receiver operating characteristic curves (ROCs). We also quantified the 95% confidence  
110 interval of the accuracy using 1000-times bootstrapping.

111           When investigating the Gini importance and the partial dependency<sup>13</sup>, we  
112 retrained the classifiers using all datasets. All data analyses were performed using  
113 Python (2.7.10) with the Scikit-learn package (0.19.0) and R (3.4.2) with the edarf  
114 package (1.1.1).

115

### 116 **2.3. Ethical considerations**

117           Informed consent was obtained from participants using an opt-out form on the  
118 website. The study protocol was approved by the Research Ethics Committee, Tokyo  
119 Metropolitan Tama Medical Center (Approval number: 28-8). The study complied with  
120 the Declaration of Helsinki and the STROBE statement.

121

## 122 **3. Results**

### 123 **3.1. Eligible patients**

124 During the 2-year study period, 497 consecutive patients (496 were Asian)  
125 were enrolled. The mean age (standard deviation, SD) was 42.3 ( $\pm$ 15.4) years, and 228  
126 patients (45.9%) were women. F2 (Schizophrenia, schizotypal, delusional, and other  
127 non-mood psychotic disorders) was diagnosed in over 60% of the patients. The ICD-10  
128 codes of the patients and the number of deficiencies at several cut-off values for vitB<sub>1</sub>,  
129 vitB<sub>12</sub>, and folate are shown in **Table 1**. According to the predefined cut-off values<sup>12</sup>,  
130 112 (22.5%), 80 (16.1%), and 72 (14.5%) patients exhibited a deficiency of vitB<sub>1</sub> (<30  
131 ng/mL), vitB<sub>12</sub> (<180 ng/L), and folate (<4.0  $\mu$ g/L), respectively. Vitamin B deficiencies  
132 in sub-groups are shown in **Table 2**. A summary of the full dataset is shown in **Table 3**.  
133 Detailed information (sub-datasets) is shown in **Supplementary Table 1, 2, and 3**  
134 online. Histograms of vitB<sub>1</sub>, vitB<sub>12</sub>, and folate values are shown in **Figure 2 A-C**.

135

### 136 **3.2. Prediction via machine-learning using routine blood test results**

137 A random forest classifier was trained to predict the deficiency of each  
138 substance from patient characteristics and routine blood test results. The classifier was  
139 trained using the dataset gathered in the period from September 2015 to December 2016  
140 (the “Training set”, n = 373), which was then validated from January 2017 through  
141 August 2017 (the “Validation set”, n = 124).

142 The area under the ROCs (AUCs) for the validation set were 0.716, 0.599, and  
143 0.796, for vitB<sub>1</sub>, vitB<sub>12</sub>, and folate, respectively (**Figure 2 D-F** and **Table 4**). With some  
144 operative points on the ROC, the sensitivity, specificity and accuracy for the validation  
145 set were calculated (**Table 4**. See also **Supplementary Table 4** for training set and  
146 **Supplementary Table 5** for different operating points).

147 When the prediction performances were compared between the classifiers  
148 trained using the dataset from the F2 population and the classifiers trained using the

149 dataset from the other population, the AUC was not statistically different (DeLong's  
150 test), except in the case of vitB<sub>1</sub> (see **Supplementary Table 6**).

151 **Figure 3** shows the Gini importance (a–c) and partial dependency plots (d–f)  
152 for the eight most important variables for each substance. The results provided further  
153 evidence of a relationship between the vitamin B levels and complete blood count while  
154 also indicating the hitherto rarely considered, potential association between these  
155 vitamins and alkaline phosphatase (ALP) or thyroid stimulating hormone (TSH).

156

### 157 **3.3. Robustness verification**

158 We verified the robustness of the results by two independent means. First, we  
159 used different cut-off values to define the deficiency<sup>14–16</sup>. Although the AUC for the  
160 validation set, shown in **Supplementary Table 7**, tended to be higher when strict  
161 cut-off values were used, the obtained AUCs were not statistically significant ( $p > 0.05$ ,  
162 DeLong's test with Bonferroni correction).

163 Second, we trained and evaluated random forest classifiers using a dataset split  
164 in a different way; the classifier was trained using the dataset collected in the period  
165 from the 31<sup>st</sup> of January, 2016 to August 2017, which was then validated with data  
166 gathered from September 2015 to the 31<sup>st</sup> of January, 2016. Note that the sample sizes  
167 of the training and validation sets were equal to those in the original setting. The AUCs  
168 for the validation set were 0.771, 0.621, and 0.745 for vitB<sub>1</sub>, vitB<sub>12</sub>, and folate,  
169 respectively; none were statistically different from the AUC trained using the original  
170 setting (DeLong's test), further demonstrating the robustness of the performance.

171



## 172 **4. Discussion**

### 173 **4.1. Relevance of the present study**

174           Based on the largest cohort to date of patients at imminent risk of seriously  
175 harming themselves or others, this study indicated that deficiency of certain vitamins  
176 can be predicted in an efficient manner via machine-learning using routine blood test  
177 results. Given the large number of patients with vitamin B deficiencies, empirical  
178 therapy might be acceptable; however, risk stratification is preferred for personalized  
179 medicine and shared decision-making. The prediction method presented here may  
180 expedite clinical decision-making as to whether vitamins should be prescribed to a  
181 patient (Graphical abstract is shown in **Figure 4**).

182           Remarkably, the AUC for folate deficiency was 0.796. Folate features the  
183 potential to maintain neuronal integrity and is one of the homocysteine-reducing  
184 B-vitamins<sup>5</sup>; homocysteine has been linked to the etiology of schizophrenia<sup>17</sup>, and  
185 vitamin B supplements have been reported to reduce psychiatric symptoms significantly  
186 in patients with schizophrenia<sup>7</sup>. As our study does not present longitudinal results, an  
187 intervention effect of folate supplementation in the cohort remains to be clarified.

188

### 189 **4.2. Trade-off of interpretability and generalizability using machine-learning**

190           Compared to the AUC of folate, AUCs of vitB<sub>1</sub> and vitB<sub>12</sub> were relatively low.  
191 Using other parameters that were not incorporated into this model or using other models  
192 including deep neural networks might increase the accuracy of prediction.

193           However, interpretability and completeness of machine-learning classifiers are  
194 subject to trade-off<sup>17</sup>. Although completeness and generalizability are desirable,  
195 interpretability is also indispensable, especially in clinical settings, since it provides  
196 meaningful and trustworthy findings for clinical physicians as well as new biological  
197 insights<sup>18</sup>. In this study we chose random forest classifiers since they provide expressive  
198 and interpretable data, with sufficient accuracy.

199

### 200 **4.3. Biological mechanism suggestion**

201           Using the random forest classifiers, as shown in **Figure 3**, we identified several  
202 items related to complete blood count as top hits. Notably, our classifier was blind to  
203 any biological knowledge, including the well-established association between anemia  
204 and vitamin B deficiency, including folate<sup>19</sup>. The results provide further evidence of a  
205 relationship between vitamin B levels and the complete blood count and support the use  
206 of machine-learning to investigate novel, underlying biological mechanisms<sup>20</sup>.

207           ALP and its metabolites indicate the vitamin B<sub>6</sub> status<sup>21</sup>; low vitB<sub>12</sub> is  
208 potentially associated with low ALP<sup>22</sup>. More generally, ALP may have a close and  
209 complicated relationship with the overall vitamin B group. Autoimmune disorders,  
210 especially thyroid disease, are commonly associated with pernicious anaemia<sup>23</sup>, but  
211 there has been no established hypothesis regarding the causal relationships between  
212 thyroid disease and vitamin B deficiencies. The potential association between the levels  
213 of these vitamins and ALP or TSH awaits further study, both investigations of  
214 populations and basic research<sup>24</sup>.

215

### 216 **4.4. Limitations**

217           This study is subject to several limitations. First, the findings of this  
218 single-center retrospective study may have limited generalizability. Second, the patients'  
219 long-term prognosis was not investigated due to administrative restrictions; the extent to  
220 which this method can expedite clinical decision-making is therefore unclear. Further,  
221 we did not investigate the relationship between serological values and the need for  
222 intervention. The lack of data for vitamin B deficiency in the Japanese general  
223 population hampered the comparison between the experimental cohort and their  
224 counterparts who lacked psychiatric symptoms. Establishing appropriate reference  
225 values and an assessment method requires further investigation. Finally, we did not

226 assess the predictive value of other nutritional impairments, including vitamin B<sub>6</sub> and  
227 homocysteine deficiency, which were previously shown to have a close link with  
228 psychiatric symptoms<sup>3,5</sup>; however, our study provides fundamental data on nutritional  
229 impairment based on the largest cohort of patients with intense psychiatric episode ever  
230 assembled for this purpose and presents a potential framework for predicting nutritional  
231 impairment using machine-learning.

232

#### 233 **4.5. Conclusion**

234 The present report is, to the best of our knowledge, the first to demonstrate that  
235 machine-learning can efficiently predict nutritional impairment. Further research is  
236 needed to validate the external generalizability of the findings in other clinical situations  
237 and clarify whether interventions based on this method can improve patient care and  
238 cost-effectiveness.

239

## 240 **5. Contribution to the Field Statement**

241 Vitamin B deficiency is common worldwide and may lead to psychiatric  
242 symptoms; however, vitamin B deficiency epidemiology in patients with intense  
243 psychiatric symptoms has rarely been examined. Moreover, vitamin deficiency testing is  
244 costly and time-consuming. Based on the largest cohort to date of patients at imminent  
245 risk of seriously harming themselves or others, this study demonstrated that the  
246 deficiency of certain vitamins can be predicted in an efficient manner via  
247 machine-learning models from patient characteristics and routine blood test results  
248 obtained within one hour.

249 In detail, among the 497 patients investigated (over 60% was diagnosed with  
250 schizophrenia or related psychotic disorders), 22.5%, 16.1%, and 14.5% patients had a  
251 deficiency of vitamin B<sub>1</sub>, B<sub>12</sub>, and folate, respectively, by direct measurement. Also, the  
252 machine-learning models well generalized to predict the deficiency in unseen datasets;  
253 areas under the receiver operating characteristic curves for the validation dataset were  
254 0.716, 0.599, and 0.796, respectively. The prediction method presented in this study  
255 may expedite risk stratification and clinical decision-making regarding whether  
256 replacement therapy should be prescribed. The results also provided further evidence for  
257 a well-known relationship between these vitamins and the complete blood count and  
258 supported the application of machine-learning to investigate novel, underlying  
259 biological mechanisms.

260

261 **6. Acknowledgements**

262 We thank Mr. James Robert Valera for his assistance in editing this manuscript  
263 and all the staff for their care of the patients and their contributions to this study.

264

265 **7. Author Contributions Statement**

266 H. Tamune has full access to all data and takes responsibility for the integrity of  
267 the data. H. Tamune, JU, KN, and NY conceived the study. H. Tamune, YH, and H.  
268 Tanaka collected the data. JU performed the statistical analyses. H. Tamune and JU  
269 drafted the first version of the manuscript. All authors critically revised the manuscript  
270 for intellectual content and approved the final version.

271

272 **8. Data Availability Statements**

273 The datasets and source code utilized in the current study are available from the  
274 corresponding author upon reasonable request.

275

276 **9. Conflict of Interest Statement**

277 The authors declare no conflict of interest, except for a scholarship grant  
278 awarded to JU from Takeda Science Foundation and Masayoshi Son Foundation.

279

280

281 **References**

- 282 1. Harper C. Thiamine (vitamin B1) deficiency and associated brain damage is still  
283 common throughout the world and prevention is simple and safe! *Eur J Neurol.* (2006)  
284 13: 1078–1082.
- 285 2. Reynolds E. Vitamin B12, folic acid, and the nervous system. *Lancet Neurol.* (2006)  
286 5: 949–960.
- 287 3. Arai M, Yuzawa H, Nohara I, Ohnishi T, Obata N, Iwayama Y *et al.* Enhanced  
288 carbonyl stress in a subpopulation of schizophrenia. *Arch Gen Psychiatry* (2010) 67:  
289 589–597.
- 290 4. Cao B, Wang DF, Xu MY, Liu YQ, Yan LL, Wang JY *et al.* Lower folate levels in  
291 schizophrenia: A meta-analysis. *Psychiatry Res.* (2016) 245: 1–7.
- 292 5. Firth J, Carney R, Stubbs B, Teasdale SB, Vancampfort D, Ward PB, *et al.* Nutritional  
293 deficiencies and clinical correlates in first-episode psychosis: A systematic review and  
294 meta-analysis. *Schizophr Bull.* (2018) 44: 1275–1292.
- 295 6. Levine J, Stahl Z, Sela BA, Ruderman V, Shumaico O, Babushkin I *et al.*  
296 Homocysteine-reducing strategies improve symptoms in chronic schizophrenic patients  
297 with hyperhomocysteinemia. *Biol Psychiatry* (2006) 60: 265–269.
- 298 7. Firth J, Stubbs B, Sarris J, Rosenbaum S, Teasdale S, Berk M *et al.* The effects of  
299 vitamin and mineral supplementation on symptoms of schizophrenia: A systematic  
300 review and meta-analysis. *Psychol Med.* (2017) 47: 1515–1527.
- 301 8. Itokawa M, Miyashita M, Arai M, Dan T, Takahashi K, Tokunaga T *et al.*  
302 Pyridoxamine: A novel treatment for schizophrenia with enhanced carbonyl stress.  
303 *Psychiatry Clin Neurosci.* (2018) 72: 35–44.
- 304 9. Koutsouleris N, Kahn RS, Chekroud AM, Leucht S, Falkai P, Wobrock T *et al.*  
305 Multisite prediction of 4-week and 52-week treatment outcomes in patients with  
306 first-episode psychosis: A machine learning approach. *Lancet Psychiatry* (2016) 3:  
307 935–946.

- 308 10. Mechelli A, Lin A, Wood S, McGorry P, Amminger P, Tognin S *et al.* Using clinical  
309 information to make individualized prognostic predictions in people at ultra-high risk  
310 for psychosis. *Schizophr Res.* (2017) 184: 32-38.
- 311 11. Vieira S, Pinaya WH, Mechelli A. Using deep learning to investigate the  
312 neuroimaging correlates of psychiatric and neurological disorders: Methods and  
313 applications. *Neurosci Biobehav Rev.* (2017) 74: 58–75.
- 314 12. Mayo Foundation for Medical Education and Research, Rochester Test Catalog.  
315 <https://www.mayomedicallaboratories.com/test-catalog/> (2018).
- 316 13. Friedman, JH. Greedy function approximation: A gradient boosting machine. *Ann.*  
317 *Stat.* (2001) 29: 1189–1232.
- 318 14. Sasaki T, Yukizane T, Atsuta H, Ishikawa H, Yoshiike T, Takeuchi T *et al.* A case of  
319 thiamine deficiency with psychotic symptoms: Blood concentration of thiamine and  
320 response to therapy. *Seishin Shinkeigaku Zasshi* (2010) 112: 97–110.
- 321 15. Clarke R, Refsum H, Birks J, Evans JG, Johnston C, Sherliker P *et al.* Screening for  
322 vitamin B-12 and folate deficiency in older persons. *Am J Clin Nutr.* (2003) 77:  
323 1241–1247.
- 324 16. Goff DC, Bottiglieri T, Arning E, Shih V, Freudenreich O, Evins AE *et al.* Folate,  
325 homocysteine, and negative symptoms in schizophrenia. *Am J Psychiatry* (2004) 161:  
326 1705–1708.
- 327 17. Muntjewerff JW, Kahn RS, Blom HJ, den Heijer M. Homocysteine,  
328 methylenetetrahydrofolate reductase and risk of schizophrenia: A meta-analysis. *Mol*  
329 *Psychiatry* (2006) 11: 143–149.
- 330 18. Gilpin LH, Bau D, Yuan BZ, Bajwa A, Specter M, Kagal L. Explaining  
331 explanations: An overview of interpretability of machine learning. In *2018 IEEE 5th*  
332 *International Conference on Data Science and Advanced Analytics (DSAA)*: 80–89.
- 333 19. Evans TC, Jehle D. The red blood cell distribution width. *J Emerg Med.* (1991) 9:  
334 71–74.

- 335 20. So HC, Chau CK, Chiu WT, Ho KS, Lo CP, Yim SH *et al.* Analysis of genome-wide  
336 association data highlights candidates for drug repositioning in psychiatry. *Nat Neurosci.*  
337 (2017) 20: 1342–1349.
- 338 21. Ueland PM, Ulvik A, Rios-Avila L, Middtun Ø, Gregory JF. Direct and functional  
339 biomarkers of vitamin B6 status. *Annu Rev Nutr.* (2015) 35: 33–70.
- 340 22. Carmel R, Lau KH, Baylink DJ, Saxena S, Singer FR. Cobalamin and  
341 osteoblast-specific proteins. *N Engl J Med.* (1977) 319: 70–75.
- 342 23. Stabler SP. Vitamin B12 deficiency. *N Engl J Med.* (2013) 368: 149–160.
- 343 24. Zheng Y, Cantley LC. Toward a better understanding of folate metabolism in health  
344 and disease. *J Exp Med.* (2018) 216: 253–266.
- 345



346 **Supporting Material List**

347 Supplementary Table 1 (related to Table 1). Divided patient distribution data (n = 497)

348 Supplementary Table 2 (related to Table 2). Divided data of vitamin B deficiencies in  
349 sub-groups

350 Supplementary Table 3 (related to Table 3). Divided dataset of age, sex, and 29  
351 parameters

352 Supplementary Table 4 (related to Table 4). Summary of sensitivity, specificity, and  
353 accuracy for the training set

354 Supplementary Table 5 (related to Table 4). Sensitivities and specificities at other  
355 operating points

356 Supplementary Table 6. Subgroup analyses

357 Supplementary Table 7. AUC with different cut-off values

358

359 **Legends**

360 **Figure 1: Graphical illustration of method of machine-learning**

361

362 **Figure 2: Histogram and ROC curves of each vitamin B value**

363 (A-C) The histograms for vitamin B<sub>1</sub>, vitamin B<sub>12</sub>, and folate (vitamin B<sub>9</sub>).

364 Their medians (1<sup>st</sup>–3<sup>rd</sup> quartile) are 35 (30–42) ng/mL, 285 (206–431) ng/L, and 7.2

365 (4.9–10.8) µg/L, respectively.

366 (D-F) ROC curves for vitamin B<sub>1</sub>, vitamin B<sub>12</sub>, and folate. Operating points

367 used in **Table 4** and **Supplementary Table 5** are depicted in blue.

368 Abbreviations: Vit B<sub>1</sub>, vitamin B<sub>1</sub>; Vit B<sub>12</sub>, vitamin B<sub>12</sub>.

369

370 **Figure 3: Gini importance and partial dependence plots of vitamin B deficiencies**

371 The Gini importance (A-C) and partial dependency plots of the probability of

372 deficiency (D-F) are shown for the eight most important variables for vitamin B<sub>1</sub>,

373 vitamin B<sub>12</sub>, and folate (vitamin B<sub>9</sub>). Combined with these, this machine-learning

374 classifier without hypothesis also provided further evidence of a relationship between

375 vitamin B levels and the complete blood count while also indicating a potential

376 association between these vitamins and alkaline phosphatase (ALP) or

377 thyroid-stimulating hormone (TSH).

378 Abbreviations: Vit B<sub>1</sub>, vitamin B<sub>1</sub>; Vit B<sub>12</sub>, vitamin B<sub>12</sub>; Hb, hemoglobin; Hct,

379 hematocrit; WBC, white blood cell count; CK, creatine kinase; RDW.CV, red blood cell

380 distribution width-coefficient variation; Plt, platelet; ALT, alanine transaminase; Lym,

381 lymphocyte fraction; Cre, creatinine; Neu, neutrocyte fraction; γGTP,

382 γ-glutamyltransferase; MCV, mean corpuscular volume; glu, plasma glucose.

383

384 **Figure 4: Graphical abstract**

385

386 **Table 1. Patient distribution data (n = 497)**

387

|   | ICD-10 code |     |      |      |     |     |     |     |     |     | VitB <sub>1</sub> |      |      | VitB <sub>12</sub> |       |      | Folate |       |      |
|---|-------------|-----|------|------|-----|-----|-----|-----|-----|-----|-------------------|------|------|--------------------|-------|------|--------|-------|------|
|   | F0          | F1  | F2   | F3   | F4  | F5  | F6  | F7  | F8  | F9  | <20               | <28  | <30* | <150               | <180* | <200 | <3.0   | <4.0* | <5.0 |
| N | 28          | 21  | 300  | 58   | 16  | 0   | 29  | 20  | 24  | 1   | 15                | 81   | 112  | 37                 | 80    | 107  | 29     | 72    | 134  |
| % | 5.6         | 4.2 | 60.4 | 11.7 | 3.2 | 0.0 | 5.8 | 4.0 | 4.8 | 0.2 | 3.0               | 16.3 | 22.5 | 7.4                | 16.1  | 21.5 | 5.8    | 14.5  | 27.0 |

388

389 Asterisks show the predefined cut-off values for vitamin B<sub>1</sub>, vitamin B<sub>12</sub>, and folate  
 390 (vitamin B<sub>9</sub>) based on a reference<sup>12</sup>; different cut-off values based on other papers<sup>14-16</sup>  
 391 are also presented for further investigation.

392

393 ICD-10 codes. F0, Mental disorders due to known physiological conditions; F1, Mental  
 394 and behavioral disorders due to psychoactive substance use; F2, Schizophrenia,  
 395 schizotypal, delusional, and other non-mood psychotic disorders; F3, Mood disorders;  
 396 F4, Anxiety, dissociative, stress-related, somatoform, and other non-psychotic mental  
 397 disorders; F5, Behavioral syndromes associated with physiological disturbances and  
 398 physical factors; F6, Disorders of adult personality and behavior; F7, Intellectual  
 399 disabilities; F8, Pervasive and specific developmental disorders; F9, Behavioral and  
 400 emotional disorders with onset usually occurring in childhood and adolescence.

401

402 **Table 2. Vitamin B deficiencies in sub-groups**

403

|                          | F0         | F1         | F2       | F3       | F4         | F6         | F7         | F8         | F9 |
|--------------------------|------------|------------|----------|----------|------------|------------|------------|------------|----|
| vitB <sub>1</sub> < 30   | 9<br>(32%) | 4<br>(19%) | 70 (23%) | 11 (19%) | 3<br>(19%) | 7<br>(24%) | 5<br>(25%) | 3<br>(13%) | 0  |
| vitB <sub>12</sub> < 180 | 5<br>(18%) | 4<br>(19%) | 53 (18%) | 7 (12%)  | 3<br>(19%) | 1 (3%)     | 4<br>(20%) | 3<br>(13%) | 0  |
| Folate < 4.0             | 5<br>(18%) | 7<br>(33%) | 38 (13%) | 6(10%)   | 5<br>(31%) | 3<br>(10%) | 4<br>(20%) | 4<br>(17%) | 0  |

404

405 Abbreviations; see **Table 1**.

406

407

408 **Table 3. Summary of full dataset of age, sex, and 29 parameters for**  
 409 **machine-learning**

410

| Parameters | Units                     | Mean    | SD   | UN                 | mg/dL             | 12.9 | 6.7  |
|------------|---------------------------|---------|------|--------------------|-------------------|------|------|
| Age        | years                     | 42.3    | 15.4 | Cre                | mg/dL             | 0.7  | 0.2  |
| Sex        | Woman                     | n = 228 |      | T.bil              | mg/dL             | 0.7  | 0.4  |
| WBC        | $\times 10^3/\mu\text{L}$ | 8.2     | 2.8  | Na                 | mmol/L            | 139  | 3    |
| Hb         | g/dL                      | 13.7    | 1.7  | Cl                 | mmol/L            | 105  | 4    |
| Hct        | %                         | 40.3    | 4.5  | K                  | mmol/L            | 3.7  | 0.4  |
| MCV        | fL                        | 89      | 6.6  | cor.Ca             | mg/dL             | 9.1  | 0.5  |
| Plt        | $\times 10^4/\mu\text{L}$ | 24.9    | 6.3  | CK                 | IU/L              | 514  | 1230 |
| RDW.CV     | %                         | 13.5    | 1.3  | AST                | IU/L              | 31   | 34   |
| Neu        | %                         | 70      | 11   | ALT                | IU/L              | 27   | 24   |
| Lym        | %                         | 23      | 10   | LDH                | IU/L              | 239  | 91   |
| Mono       | %                         | 6       | 2    | ALP                | IU/L              | 224  | 81   |
| Eo         | %                         | 1       | 2    | $\gamma\text{GTP}$ | IU/L              | 37   | 63   |
| Baso       | %                         | 0       | 0    | Glu                | mg/dL             | 112  | 40   |
| TP         | g/dL                      | 7.2     | 0.6  | CRP                | mg/dL             | 0.4  | 0.9  |
| Alb        | g/dL                      | 4.4     | 0.4  | TSH                | $\mu\text{IU/mL}$ | 1.7  | 2.4  |

411

412 Two patients lacked age data (no photo ID was available), and one patient lacked  
 413 biochemistry data (inappropriate sample processing). For machine-learning, the missing  
 414 values were replaced using the mean.

415

416 Abbreviations: WBC, white blood cell count; Hb, hemoglobin; Hct, hematocrit; MCV,  
 417 mean corpuscular volume; RDW.CV, red blood cell distribution width-coefficient  
 418 variation; Plt, platelet; Neu, neutrocyte fraction; Lym, lymphocyte fraction; Mono,  
 419 monocyte fraction; Eo, eosinocyte fraction; Baso, basocyte fraction; TP, total protein;  
 420 Alb, albumin; UN, urea nitrogen; Cre, creatinine; T.bil, total bilirubin; Na, sodium; Cl,

421 chloride; K, potassium; cor.Ca, corrected calcium; CK, creatine kinase; AST, aspartate  
422 transaminase; ALT, alanine transaminase; LDH, lactate dehydrogenase; ALP, alkaline  
423 phosphatase;  $\gamma$ GTP,  $\gamma$ -glutamyltransferase; Glu, plasma glucose; CRP, C-reactive  
424 protein; TSH, thyroid-stimulating hormone.  
425

426 **Table 4. Summary of AUC, sensitivity, specificity, and accuracy for the validation**  
427 **set**

428

|             | vitB <sub>1</sub>   | vitB <sub>12</sub>  | Folate              |
|-------------|---------------------|---------------------|---------------------|
| AUC         | 0.716               | 0.599               | 0.796               |
| Sensitivity | 0.594               | 0.316               | 0.667               |
| Specificity | 0.783               | 0.943               | 0.917               |
| Accuracy    | 0.688 [0.597–0.787] | 0.629 [0.523–0.746] | 0.792 [0.665–0.909] |

429

430 Generalization performance of the classifiers was evaluated using AUC of the validation  
431 set. Sensitivity, specificity, and accuracy of the classification at the optimal operating  
432 points that maximized accuracy on the receiver operating characteristic curve of the  
433 validation set are also shown (see also **Figure 2 D-F**). Accuracy was defined as the  
434 average of the sensitivity and specificity. Square brackets indicate the 95% CI. Note that  
435 the 95% CI of each accuracy does not include 0.5, which demonstrates statistical  
436 significance. For further information, see **Figure 2** and **Supplementary Table 5**.

437

438 Abbreviations: AUC, area under the receiver operating characteristic curve; CI,  
439 confidence interval.

440

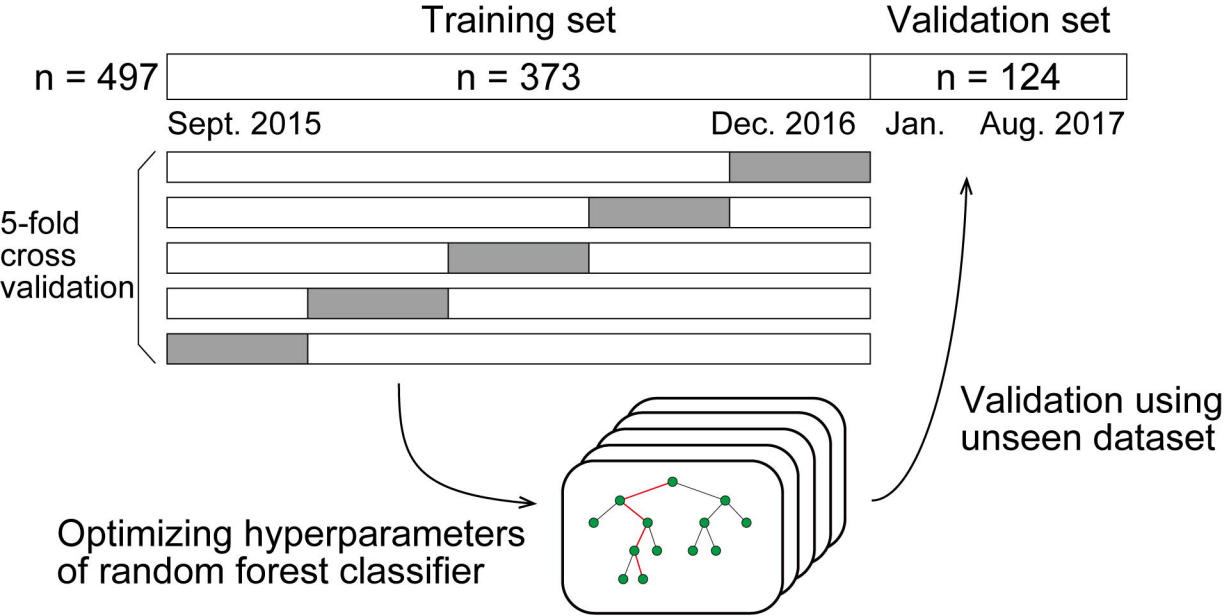

Figure 1



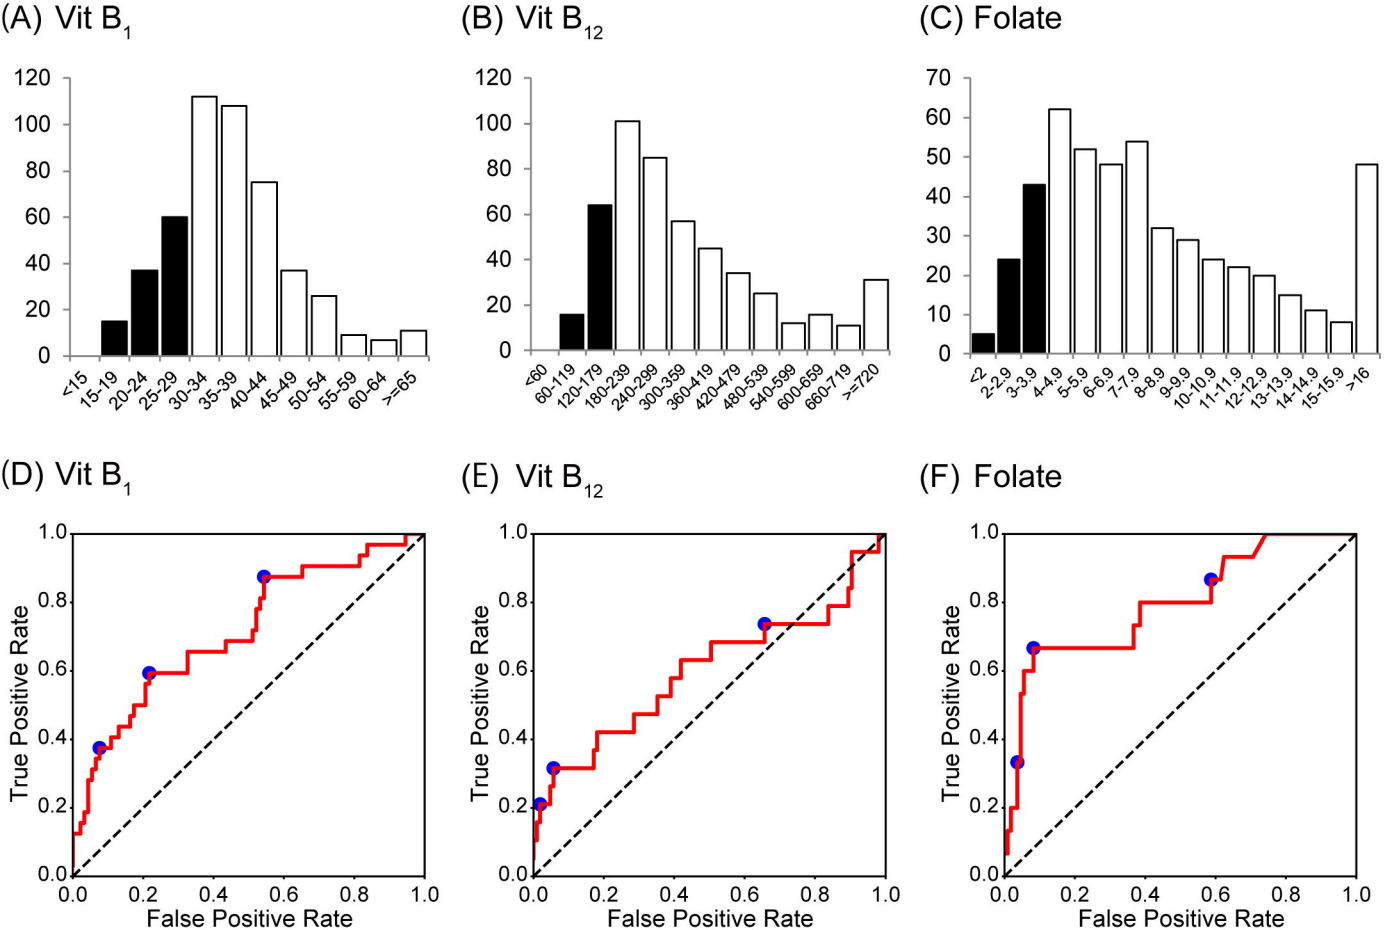

Figure 2

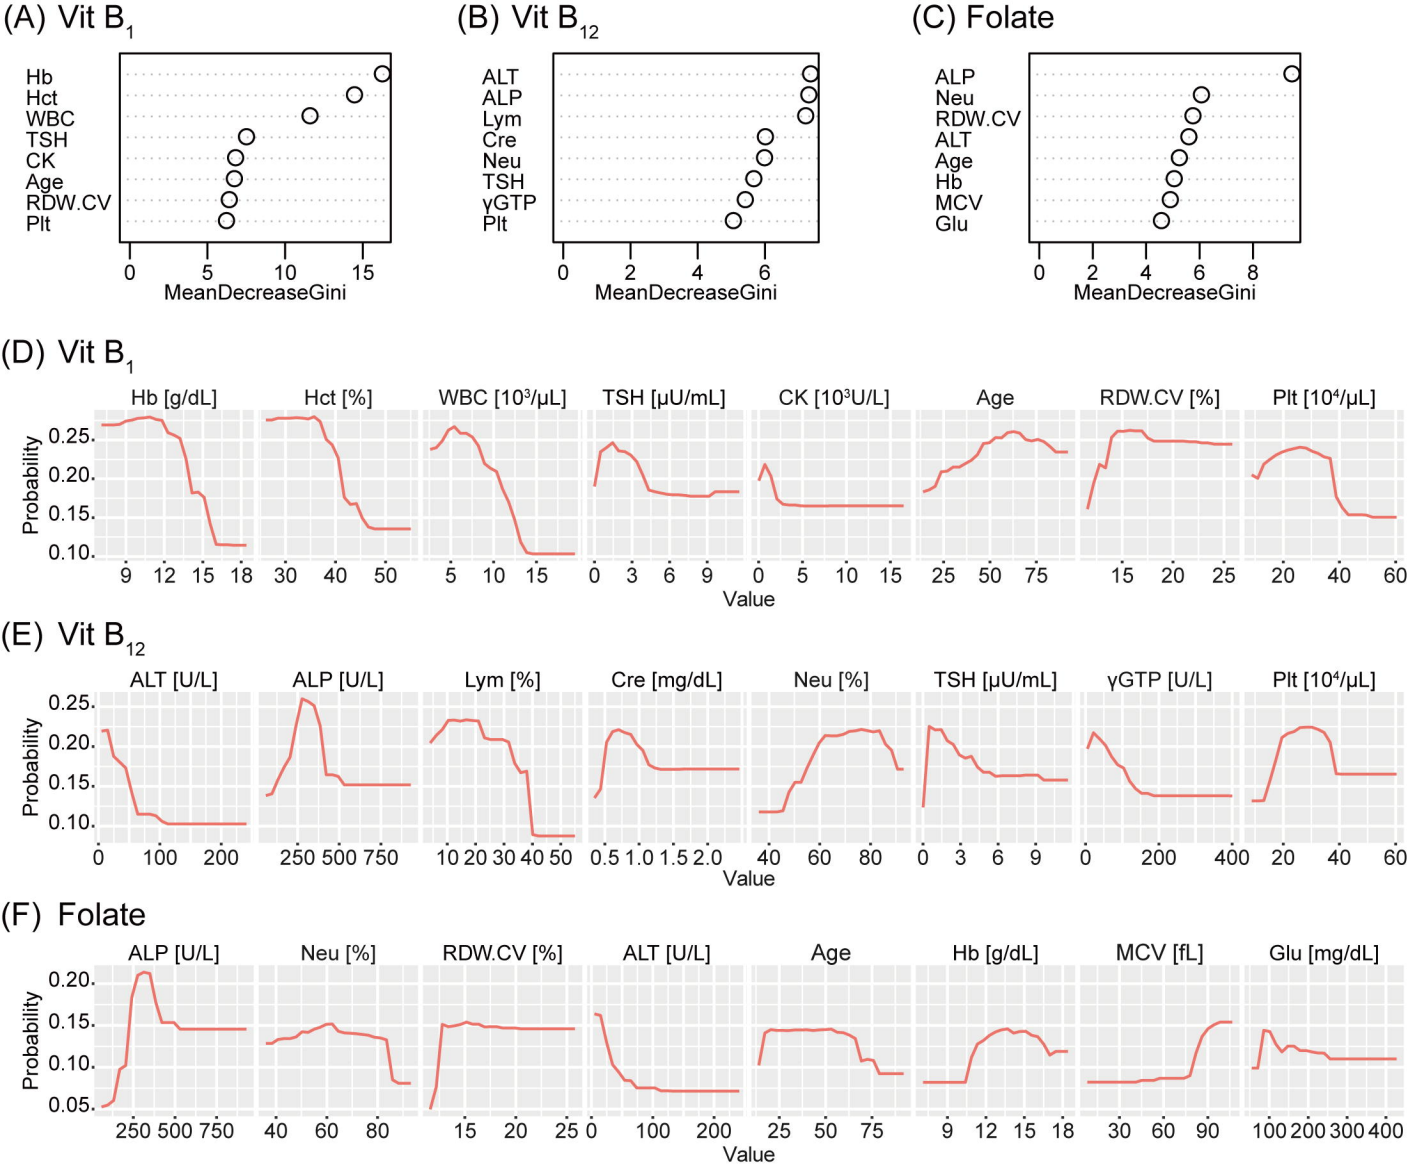

Figure 3

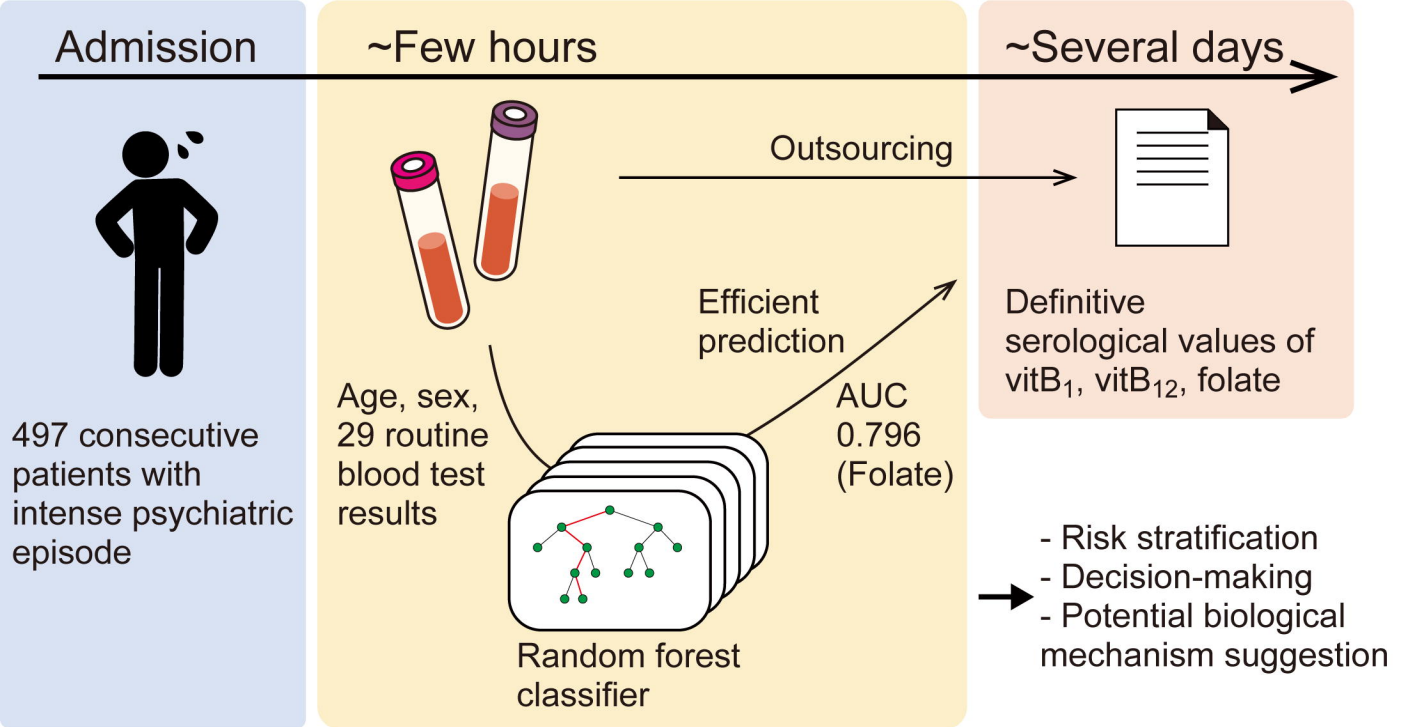

Figure 4
